# Supplementary material for: Palladium Particles Modified by Mixed-Frequency Square-Wave Potential Treatment to Enhance Electrocatalytic Performance for Formic Acid Oxidation
Source: MDPI journal article supplement (doi:10.3390/catal11040522), 2021-04-20
Supplement: s1 [file s1]

Supporting Information

# Palladium Particles Modified by Mixed-Frequency Square-Wave Potential Treatment to Enhance Electrocatalytic Performance for Formic Acid Oxidation

Fangchao Li <sup>1</sup>, Bin Liu <sup>1</sup>, Yuanhao Shen <sup>1</sup>, Jie Liu <sup>1</sup>, Cheng Zhong <sup>1,2,\*</sup> and Wenbin Hu <sup>1,2</sup>

<sup>1</sup> Key Laboratory of Advanced Ceramics and Machining Technology (Ministry of Education), Tianjin Key Laboratory of Composite and Functional Materials, School of Materials Science and Engineering, Tianjin University, Tianjin 300072, China; lfc2018208170@tju.edu.cn (F.L.); arthurloub@163.com (B.L.); shenyuanhao1997@163.com (Y.S.); jieliu0109@tju.edu.cn (J.L.); wbbu@tju.edu.cn (W.H.)

<sup>2</sup> Joint School of National University of Singapore and Tianjin University, International Campus of Tianjin University, Binhai New City, Fuzhou 119077, China

\* Correspondence: cheng.zhong@tju.edu.cn; zhong@tju.edu.cn

**Citation:** Li, F.; Liu, B.; Shen, Y.; Liu, J.; Zhong, C.; Hu, W. Palladium Particles Modified by Mixed-Frequency Square-Wave Potential Treatment to Enhance Electrocatalytic Performance for Formic Acid Oxidation. *Catalysts* **2021**, *11*, 522. <https://doi.org/10.3390/catal11040522>

Academic Editor: Ali Seifitokaldani

Received: date

Accepted: date

Published: 20 April 2021

**Publisher's Note:** MDPI stays neutral with regard to jurisdictional claims in published maps and institutional affiliations.

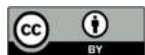

**Copyright:** © 2021 by the authors. Licensee MDPI, Basel, Switzerland. This article is an open access article distributed under the terms and conditions of the Creative Commons Attribution (CC BY) license (<http://creativecommons.org/licenses/by/4.0/>).

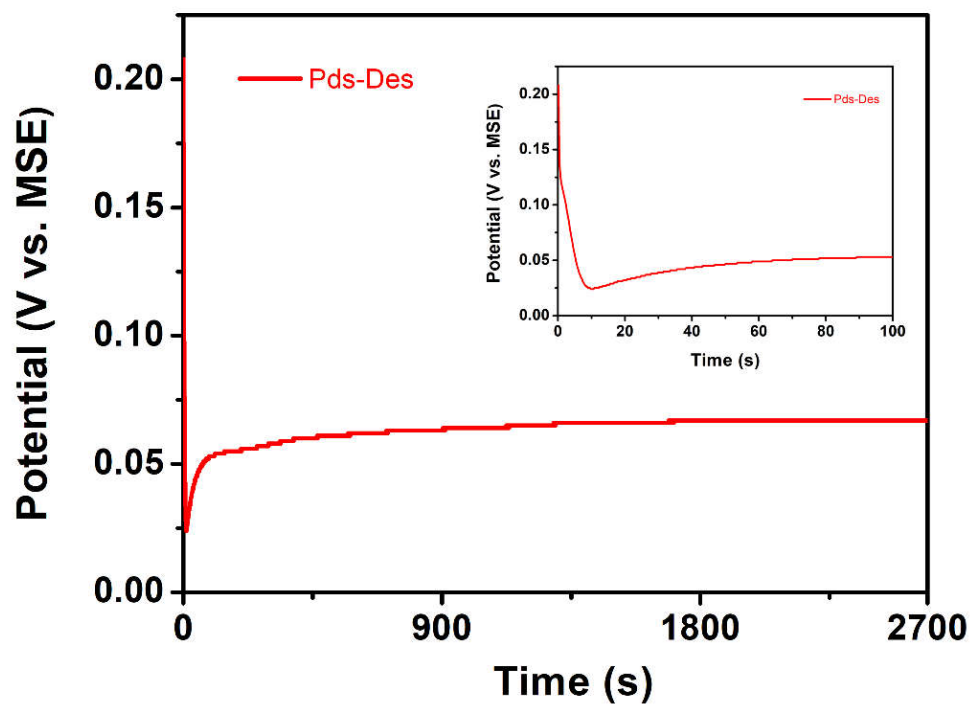

**Figure S1.** Chronoamperograms measured during electrodeposition at  $-0.15 \text{ mA cm}^{-2}$  for 2700 s.

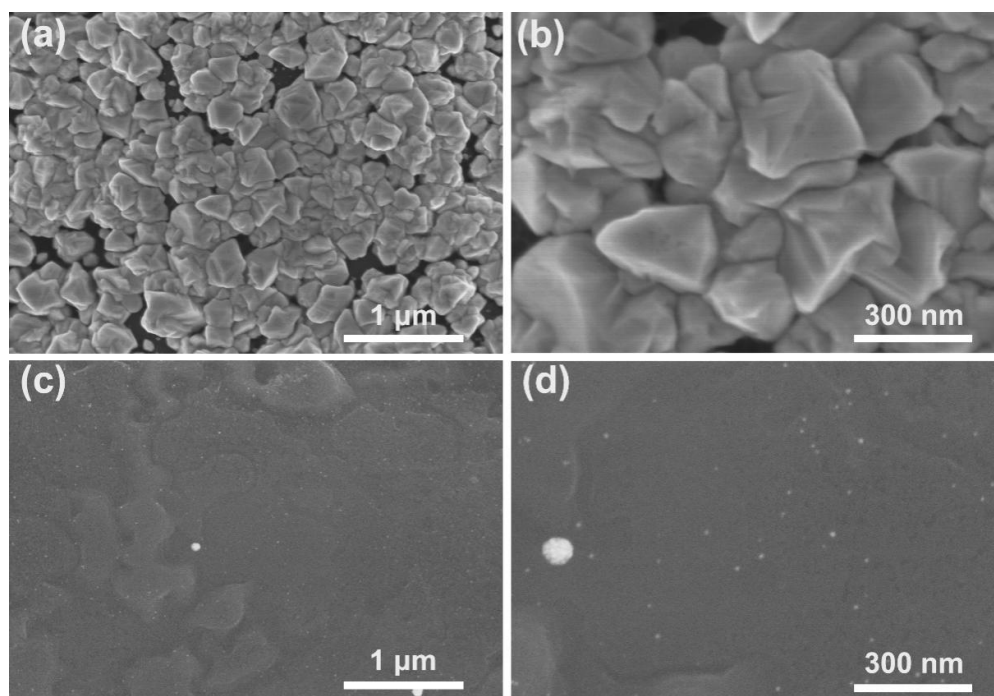

**Figure S2.** a) Low-magnification SEM image and b) high-magnification SEM image of Pd particles electrodeposited for 2700 s at  $-0.30 \text{ mA cm}^{-2}$ ; c) low-magnification SEM image and d) high-magnification SEM image of Pd particles electrodeposited for 2700 s at  $-0.05 \text{ mA cm}^{-2}$ .

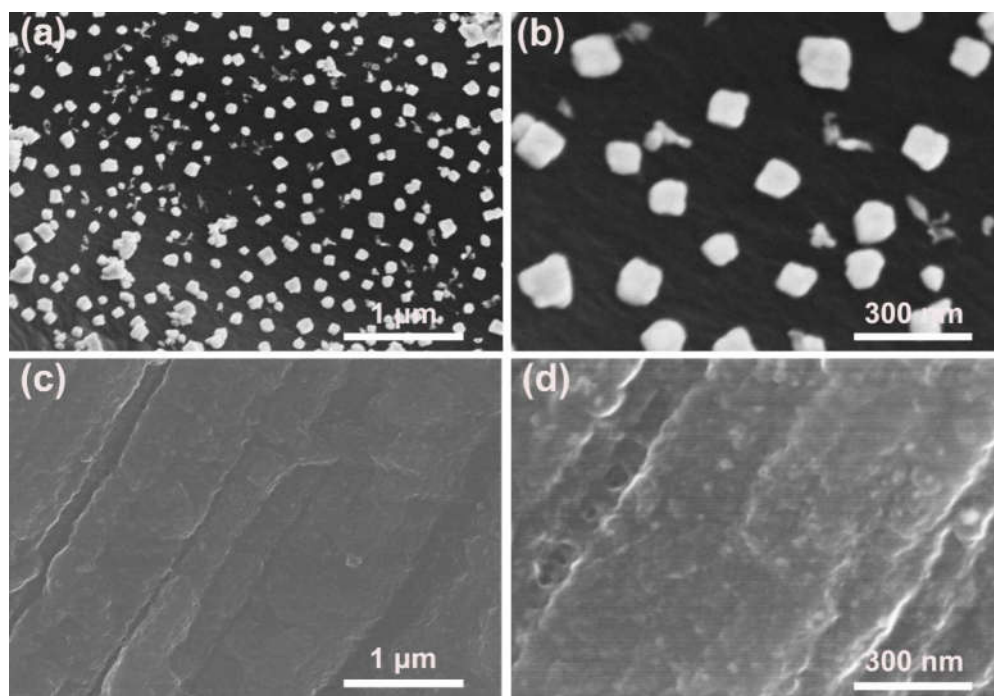

**Figure S3.** a) Low-magnification SEM image and b) high-magnification SEM image of Pd electrodeposited at  $-0.15 \text{ mA cm}^{-2}$  for 2700 s on carbon paper and then treated by square-wave potential between 0.6 V and  $-3.2 \text{ V}$  for 2 h with a frequency of 10 Hz in 1 M  $\text{H}_2\text{SO}_4$  solution; c) low-magnification SEM image and d) high-magnification SEM image of Pd particles electro-deposited at  $-0.15 \text{ mA cm}^{-2}$  for 2700 s and then square-wave potential between 0.6 V and  $-3.2 \text{ V}$  for 4 h with a frequency of 10 Hz in 1 M  $\text{H}_2\text{SO}_4$  solution.

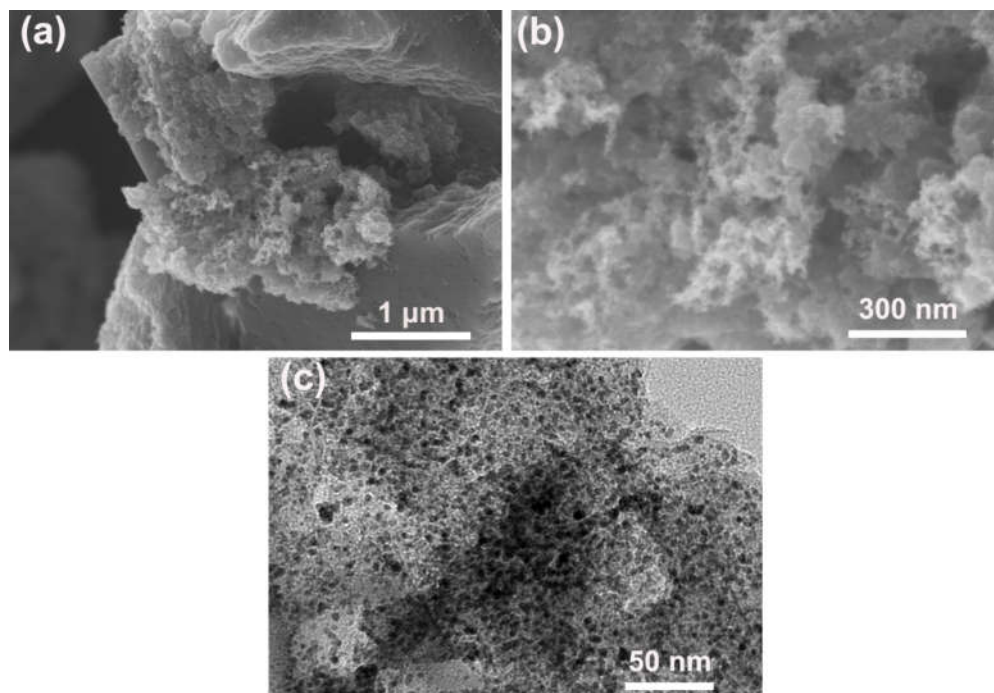

**Figure S4.** a) Low-magnification SEM image; b) high-magnification SEM image; c) TEM image of Pd/C.

**Table S1.** Comparison between Pds–Mixed and state-of-the-art Pd-based catalysts in terms of catalytic current toward FAO a scan rate of 50 mV s<sup>−1</sup>.

| Sample                                            | The condition of test toward FAO                    | The composition of catalyst                          | The amount of catalyst | Current peak                           | Reference |
|---------------------------------------------------|-----------------------------------------------------|------------------------------------------------------|------------------------|----------------------------------------|-----------|
| Pds–Mixed                                         | 0.5 M H <sub>2</sub> SO <sub>4</sub> + 0.5 M HCOOH  | Pd particles                                         | 0.038 mg               | 1.43 A mg <sup>−1</sup>                | this work |
| H–Pd–3                                            | 0.5 M HClO <sub>4</sub> + 0.5 M HCOOH               | H–Pd-3/Ketjen carbon (EC300J)                        | /                      | 1.8 A mg <sup>−1</sup>                 | [1]       |
| Pd <sub>1.1</sub> /WO <sub>2.72</sub>             | 0.1 M HClO <sub>4</sub> + 0.1 M HCOOH               | Pd/WO <sub>2.72</sub> /KetjenBlack EC-300-J carbon   | 0.04 mg                | 1.615 A mg <sub>Pd</sub> <sup>−1</sup> | [2]       |
| Freestanding Pd nanosheets                        | 0.5 M H <sub>2</sub> SO <sub>4</sub> + 0.25 M HCOOH | 41 nm hexagonal Pd nanoplates                        | /                      | 1.38 A mg <sup>−1</sup>                | [3]       |
| Twisted palladium–copper nanochains               | 0.5 M H <sub>2</sub> SO <sub>4</sub> + 0.5 M HCOOH  | Tcs-PdCu/XC-72 carbon                                | about 0.006 mg         | 1.1 A mg <sub>Pd</sub> <sup>−1</sup>   | [4]       |
| PdH <sub>0.43</sub> -200 °C                       | 0.5 M H <sub>2</sub> SO <sub>4</sub> + 0.25 M HCOOH | PdH <sub>0.43</sub> -200 °C                          | 0.005 mg               | 1.06 A mg <sup>−1</sup>                | [5]       |
| 3D graphene hollow nanospheres@palladium-networks | 0.5 M H <sub>2</sub> SO <sub>4</sub> + 0.5 M HCOOH  | 3D graphene hollow nanospheres@palladium-networks    | 0.012 mg               | 0.97 A mg <sub>Pd</sub> <sup>−1</sup>  | [6]       |
| Pd/NYPA–MWCNTs                                    | 0.5 M H <sub>2</sub> SO <sub>4</sub> + 0.5 M HCOOH  | Pd/NYPA–MWCNTs                                       | 0.01 mg                | 0.954 A mg <sub>Pd</sub> <sup>−1</sup> | [7]       |
| Pd <sub>4</sub> Sn nanochain networks             | 0.5 M H <sub>2</sub> SO <sub>4</sub> + 0.5 M HCOOH  | Pd <sub>4</sub> Sn nanochain networks + XC-72 carbon | 0.012 mg               | 0.85 A mg <sub>Pd</sub> <sup>−1</sup>  | [8]       |
| Pd <sub>3</sub> Fe/C                              | 0.5 M H <sub>2</sub> SO <sub>4</sub> + 0.5 M HCOOH  | Pd <sub>3</sub> Fe/C                                 | about 0.012 mg         | 0.696 A mg <sup>−1</sup>               | [9]       |
| Pd <sub>1</sub> Cu <sub>3</sub> /CNTs             | 0.5 M H <sub>2</sub> SO <sub>4</sub> + 0.5 M HCOOH  | Pd <sub>1</sub> Cu <sub>3</sub> /CNTs                | /                      | 0.56 A mg <sup>−1</sup>                | [10]      |
| Pd/NS–G                                           | 0.5 M H <sub>2</sub> SO <sub>4</sub> + 0.5 M HCOOH  | Pd/NS–G                                              | /                      | 0.502 A mg <sup>−1</sup>               | [11]      |
| Pd <sub>3</sub> Pt half-shells                    | 0.5 M H <sub>2</sub> SO <sub>4</sub> + 0.5 M HCOOH  | Pd <sub>3</sub> Pt half-shells                       | 0.012 mg               | 0.318 A mg <sup>−1</sup>               | [12]      |

|             |                                                    |             |            |                          |      |
|-------------|----------------------------------------------------|-------------|------------|--------------------------|------|
| Pd@graphene | 0.5 M H <sub>2</sub> SO <sub>4</sub> + 0.5 M HCOOH | Pd@graphene | 0.01386 mg | 0.0895A mg <sup>-1</sup> | [13] |
|-------------|----------------------------------------------------|-------------|------------|--------------------------|------|

Abbreviations:

Tcs-PdCu: twisted PdCu nanochains; NYPA: naphthalen-1-ylmethylphosphonic acid; MWCNTs: multiwall carbon nanotubes; CNTs: carbon nanotubes; NS-G: N and S dual-doped graphene.

## References

1. Tianou, H.; Wang, W.; Yang, X.; Cao, Z.; Kuang, Q.; Wang, Z.; Shan, Z.; Jin, M.; Yin, Y. Inflating hollow nanocrystals through a repeated Kirkendall cavitation process. *Nat. Commun.* **2017**, *8*, doi:<https://doi.org/10.1038/s41467-017-01258-0>.
2. Xi, Z.; Erdosy, D.P.; Mendoza-Garcia, A.; Duchesne, P.N.; Li, J.; Muzzio, M.; Li, Q.; Zhang, P.; Sun, S. Pd nanoparticles coupled to WO<sub>2.72</sub> nanorods for enhanced electrochemical oxidation of formic acid. *Nano Lett.* **2017**, *17*, 2727–2731, doi:<https://doi.org/10.1021/acs.nanolett.7b00870>.
3. Huang, X.; Tang, S.; Mu, X.; Dai, Y.; Chen, G.; Zhou, Z.; Ruan, F.; Yang, Z.; Zheng, N. Freestanding palladium nanosheets with plasmonic and catalytic properties. *Nat. Nanotechnol.* **2011**, *6*, 28–32, doi:<https://doi.org/10.1038/nnano.2010.235>.
4. Zhang, L.Y.; Gong, Y.; Wu, D.; Wu, G.; Xu, B.; Bi, L.; Yuan, W.; Cui, Z. Twisted palladium-copper nanochains toward efficient electrocatalytic oxidation of formic acid. *J. Colloid Interface Sci.* **2019**, *537*, 366–374, doi:<https://doi.org/10.1016/j.jcis.2018.11.038>.
5. Zhang, J.; Chen, M.; Li, H.; Li, Y.; Ye, J.; Cao, Z.; Fang, M.; Kuang, Q.; Zheng, J.; Xie, Z. Stable palladium hydride as a superior anode electrocatalyst for direct formic acid fuel cells. *Nano Energy* **2018**, *44*, 127–134, doi:<https://doi.org/10.1016/j.nanoen.2017.11.075>.
6. Qiu, X.; Wu, P.; Xu, L.; Tang, Y.; Lee, J.M. 3D graphene hollow nanospheres@palladium-networks as an efficient electrocatalyst for formic acid oxidation. *Adv. Mater. Interfaces* **2015**, *2*, doi:<https://doi.org/10.1002/admi.201500321>.
7. Zheng, M.; Li, P.; Fu, G.; Chen, Y.; Zhou, Y.; Tang, Y.; Lu, T. Efficient anchorage of highly dispersed and ultrafine palladium nanoparticles on the water-soluble phosphonate functionalized multiwall carbon nanotubes. *Appl. Catal. B-Environ.* **2013**, *129*, 394–402, doi:<https://doi.org/10.1016/j.apcatb.2012.09.047>.
8. Gong, Y.; Liu, X.; Gong, Y.; Wu, D.; Xu, B.; Bi, L.; Zhang, L.Y.; Zhao, X.S. Synthesis of defect-rich palladium-tin alloy nanochain networks for formic acid oxidation. *J. Colloid Interface Sci.* **2018**, *530*, 189–195, doi:<https://doi.org/10.1016/j.jcis.2018.06.074>.
9. Liu, Z.; Fu, G.; Li, J.; Liu, Z.; Xu, L.; Sun, D.; Tang, Y. Facile synthesis based on novel carbon-supported cyanogel of structurally ordered Pd<sub>3</sub>Fe/C as electrocatalyst for formic acid oxidation. *Nano Res.* **2018**, *11*, 4686–4696, doi:<https://doi.org/10.1007/s12274-018-2051-7>.
10. Zhao, Q.; Wang, J.; Huang, X.; Yao, Y.; Zhang, W.; Shao, L. Copper-enriched palladium-copper alloy nanoparticles for effective electrochemical formic acid oxidation. *Electrochem. Commun.* **2016**, *69*, 55–58, doi:<https://doi.org/10.1016/j.elecom.2016.05.021>.
11. Zhang, X.; Zhu, J.; Tiwary, C.S.; Ma, Z.; Huang, H.; Zhang, J.; Lu, Z.; Huang, W.; Wu, Y. Palladium nanoparticles supported on nitrogen and sulfur dual-doped graphene as highly active electrocatalysts for formic acid and methanol oxidation. *ACS Appl. Mater. Interfaces* **2016**, *8*, 10858–10865, doi:<https://doi.org/10.1021/acsami.6b01580>.
12. Yan, X.; Hu, X.; Fu, G.; Xu, L.; Lee, J.M.; Tang, Y. Facile synthesis of porous Pd<sub>3</sub>Pt half-shells with rich “active sites” as efficient catalysts for formic acid oxidation. *Small* **2018**, *14*, 1703940, doi:<https://doi.org/10.1002/sml.201703940>.
13. Zhang, L.Y.; Zhao, Z.L.; Li, C.M. Formic acid-reduced ultrasmall Pd nanocrystals on graphene to provide superior electrocatalytic activity and stability toward formic acid oxidation. *Nano Energy* **2015**, *11*, 71–77, doi:<https://doi.org/10.1016/j.nanoen.2014.10.008>.
